# Supplementary material for: Transcriptomic Alterations in Water Flea (Daphnia magna) following Pravastatin Treatments: Insect Hormone Biosynthesis and Energy Metabolism
Source: MDPI journal article supplement (doi:10.3390/toxics10030110), 2022-02-25
Supplement: s1 [file s1]

# Supplementary Materials: Transcriptomic Alterations in Water Flea (*Daphnia magna*) Following Pravastatin Treatments: Insect Hormone Biosynthesis and Energy Metabolism

Yuan Lei, Jiahua Guo, Qiqi Chen, Jiezhong Mo, Yulu Tian, Hisato Iwata and Jinxi Song

**Table S1.** List of basic pathways affected by pravastatin sodium exposure ( $p < 0.05$ ).

| Category                             | Pathway                                                                 | P value              | Up-gene                  | Down-gene               |
|--------------------------------------|-------------------------------------------------------------------------|----------------------|--------------------------|-------------------------|
| C-vs-L                               |                                                                         |                      |                          |                         |
| Human Diseases                       | Amphetamine addiction                                                   | $7.0 \times 10^{-3}$ | <i>ddc</i>               | -                       |
| Human Diseases                       | Chemical carcinogenesis                                                 | $3.9 \times 10^{-5}$ | <i>cox2, gst, ugt</i>    | -                       |
| Human Diseases                       | Cocaine addiction                                                       | $3.8 \times 10^{-3}$ | <i>ddc</i>               | -                       |
| Metabolism                           | Arachidonic acid metabolism                                             | $6.3 \times 10^{-3}$ | <i>gst</i>               | -                       |
| Metabolism                           | Arginine biosynthesis                                                   | $4.3 \times 10^{-2}$ | <i>nos1</i>              | -                       |
| Metabolism                           | Ascorbate and aldarate metabolism                                       | $4.4 \times 10^{-3}$ | <i>ugt</i>               | -                       |
| Metabolism                           | Cysteine and methionine metabolism                                      | $7.0 \times 10^{-3}$ | <i>gclc, gss</i>         | -                       |
| Metabolism                           | Pentose and glucuronate interconversions                                | $2.6 \times 10^{-4}$ | <i>akr1b, ugt</i>        | -                       |
| Metabolism                           | Phenylalanine metabolism                                                | $1.4 \times 10^{-3}$ | <i>ddc</i>               | -                       |
| Metabolism                           | Porphyrin and chlorophyll metabolism                                    | $7.7 \times 10^{-3}$ | <i>ugt</i>               | -                       |
| Metabolism                           | Retinol metabolism                                                      | $1.3 \times 10^{-2}$ | <i>ugt</i>               | -                       |
| Metabolism                           | Starch and sucrose metabolism                                           | $1.3 \times 10^{-2}$ | <i>amy</i>               | -                       |
| Metabolism                           | Steroid hormone biosynthesis                                            | $8.1 \times 10^{-3}$ | <i>ugt</i>               | -                       |
| Metabolism                           | Tryptophan metabolism                                                   | $5.3 \times 10^{-3}$ | <i>ddc</i>               | -                       |
| Metabolism                           | Tyrosine metabolism                                                     | $1.5 \times 10^{-3}$ | <i>ddc</i>               | -                       |
| Organismal Systems                   | Carbohydrate digestion and absorption                                   | $8.9 \times 10^{-3}$ | <i>amy</i>               | -                       |
| Organismal Systems                   | Dopaminergic synapse                                                    | $1.3 \times 10^{-2}$ | <i>ddc</i>               | -                       |
| Organismal Systems                   | Serotonergic synapse                                                    | $3.3 \times 10^{-4}$ | <i>cox2, ddc</i>         | -                       |
| C-vs-M                               |                                                                         |                      |                          |                         |
| Cellular Processes                   | Lysosome                                                                | $2.9 \times 10^{-2}$ | <i>npc2</i>              | <i>cd63, ctsl</i>       |
| Environmental Information Processing | FoxO signaling pathway                                                  | $4.1 \times 10^{-2}$ | -                        | <i>fbxo25_32, g6pc</i>  |
| Human Diseases                       | Proteoglycans in cancer                                                 | $1.9 \times 10^{-2}$ | <i>twist</i>             | <i>cd63, ctsl</i>       |
| C-vs-H                               |                                                                         |                      |                          |                         |
| Cellular Processes                   | Ferroptosis                                                             | $2.5 \times 10^{-2}$ | <i>fth1, gclc</i>        | -                       |
| Environmental Information Processing | ECM-receptor interaction                                                | $3.9 \times 10^{-2}$ | -                        | <i>col1a, col4a</i>     |
| Environmental Information Processing | Neuroactive ligand-receptor interaction                                 | $6.8 \times 10^{-3}$ | -                        | <i>gria1, prss1_2_3</i> |
| Human Diseases                       | Chemical carcinogenesis                                                 | $2.5 \times 10^{-3}$ | <i>cyp1a1, gst, ugt,</i> | -                       |
| Human Diseases                       | Influenza A                                                             | $3.0 \times 10^{-2}$ | <i>prss1_2_3</i>         | -                       |
| Human Diseases                       | Staphylococcus aureus infection                                         | $1.0 \times 10^{-2}$ | <i>cfi</i>               | <i>cyp3a</i>            |
| Metabolism                           | Amino sugar and nucleotide sugar metabolism                             | $6.7 \times 10^{-3}$ | <i>e3.2.1.14</i>         | <i>anpep</i>            |
| Metabolism                           | Glycosaminoglycan biosynthesis - chondroitin sulfate / dermatan sulfate | $2.5 \times 10^{-2}$ | <i>csgalnact1_2, ust</i> | -                       |
| Metabolism                           | Linoleic acid metabolism                                                | $1.0 \times 10^{-2}$ | <i>cyp3a</i>             | <i>grik2, prss1_2_3</i> |

|                    |                                     |                      |                           |                                         |
|--------------------|-------------------------------------|----------------------|---------------------------|-----------------------------------------|
| Metabolism         | Monobactam biosynthesis             | $4.6 \times 10^{-5}$ | -                         | <i>cela2, col1a, col4a, prss1_2_3,</i>  |
| Metabolism         | Retinol metabolism                  | $1.2 \times 10^{-3}$ | <i>cyp3a4, ugt</i>        | <i>dhhs3, dhhs4, rdh5, rdh8</i>         |
| Metabolism         | Selenocompound metabolism           | $4.4 \times 10^{-3}$ | -                         | <i>cela2, clca2, prss1_2_3</i>          |
| Metabolism         | Starch and sucrose metabolism       | $3.2 \times 10^{-2}$ | <i>amy, e3.2.1.4, tps</i> | <i>prss1_2_3</i>                        |
| Metabolism         | Steroid hormone biosynthesis        | $1.4 \times 10^{-2}$ | <i>cyp3a, ugt</i>         | -                                       |
| Metabolism         | Sulfur metabolism                   | $1.7 \times 10^{-3}$ | -                         | <i>cyp3a4, dhhs3, dhhs4, rdh5, rdh8</i> |
| Organismal Systems | Antigen processing and presentation | $3.6 \times 10^{-2}$ | <i>ctss,</i>              | <i>ctsb</i>                             |
| Organismal Systems | Complement and coagulation cascades | $1.7 \times 10^{-3}$ | <i>cfh</i>                | <i>papss</i>                            |

C-vs-L

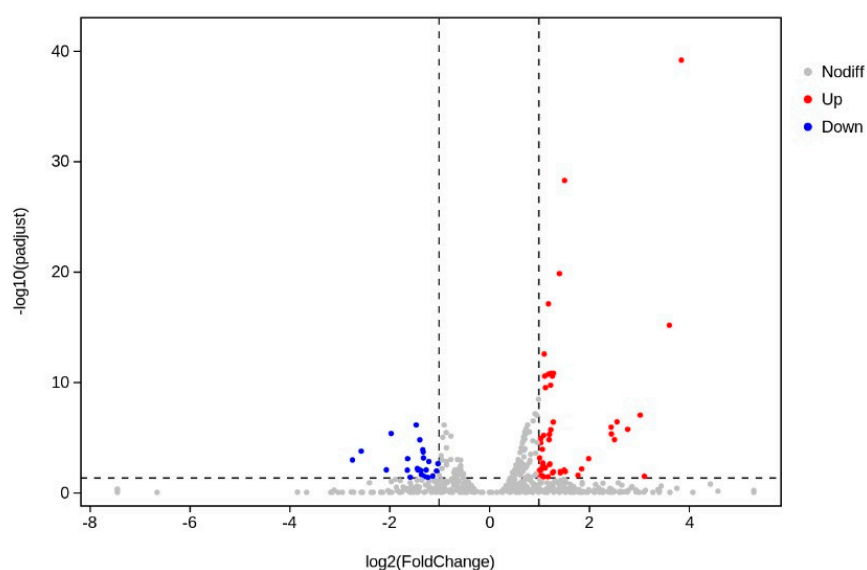

C-vs-M

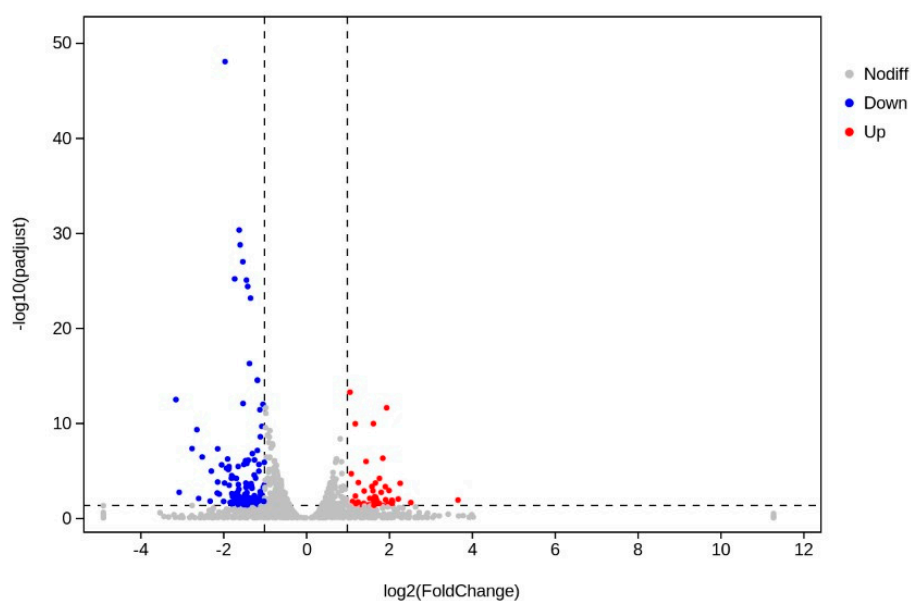

C-vs-H

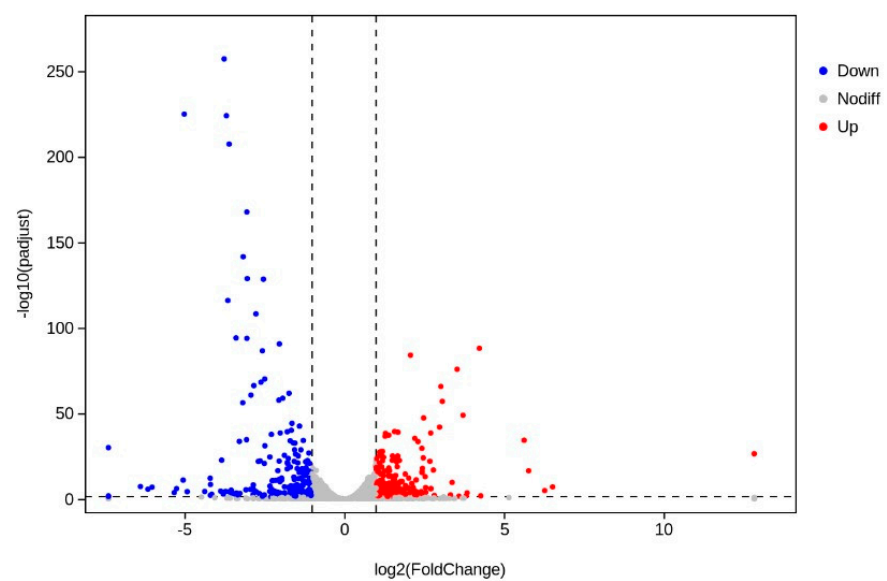

**Figure S1.** Volcano plots of all differentially expressed genes (DEGs) in the pravastatin sodium-treated groups. The X-axis depicts the log2 fold change of DEGs and the Y-axis depicts the  $-\log_{10}$  (adjust p value).

*methyl farnesoate epoxidase / farnesoate epoxidase-cyp15a1\_c1*

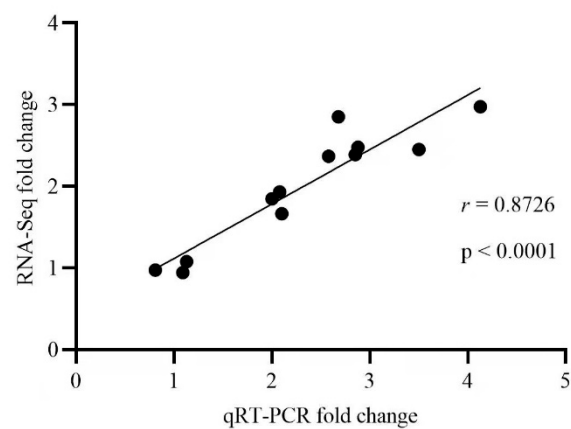

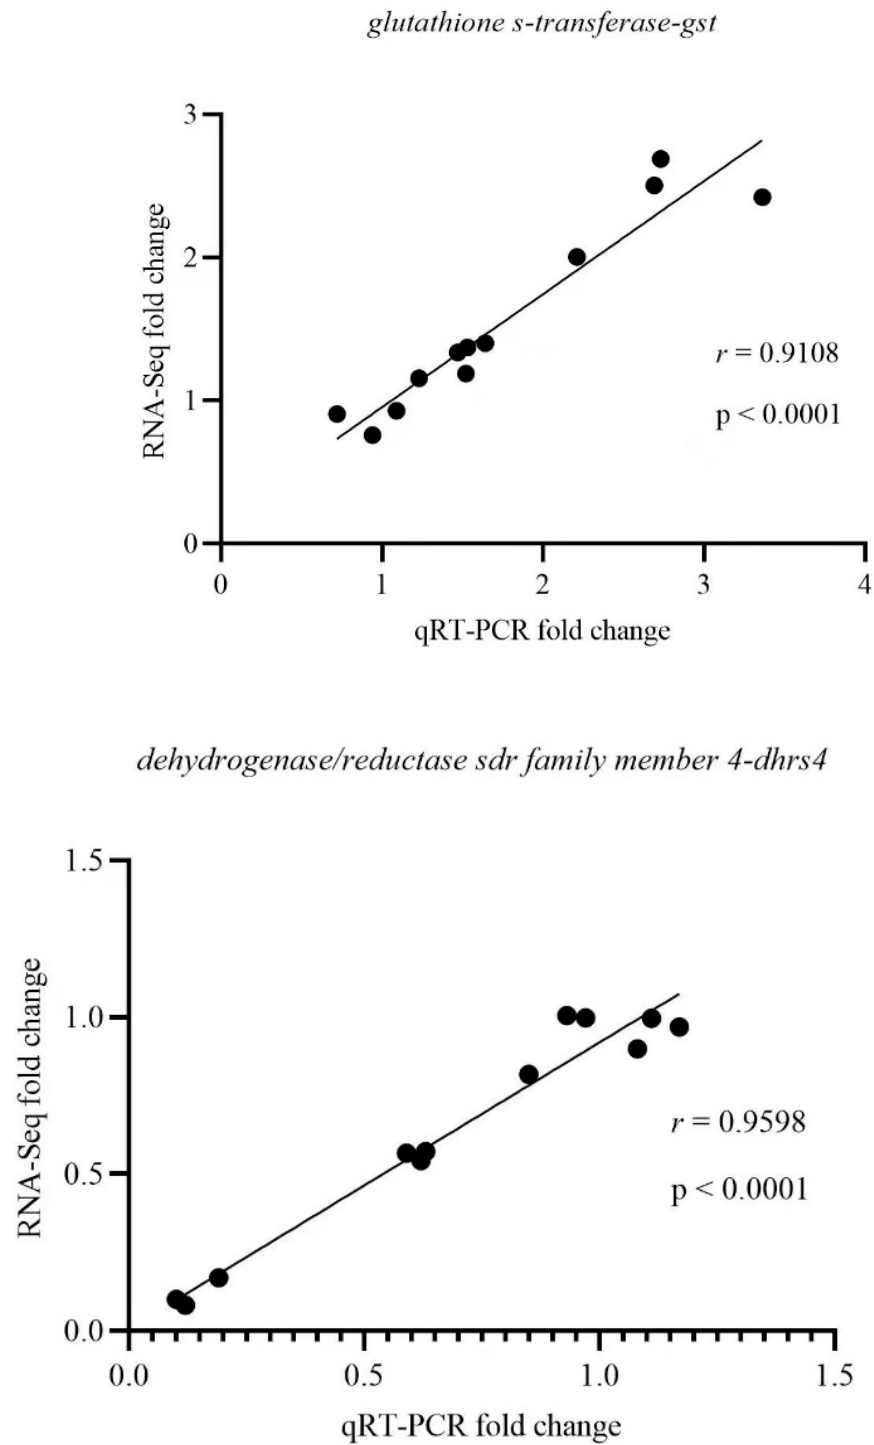

**Figure S2.** The correlation between fold changes (pravastatin sodium-treated groups relative to control) in mRNA levels determined by qRT-PCR and RNA-seq of genes *cyp15a1\_c1*, *gst* and *dhrs4*.

## C-vs-L

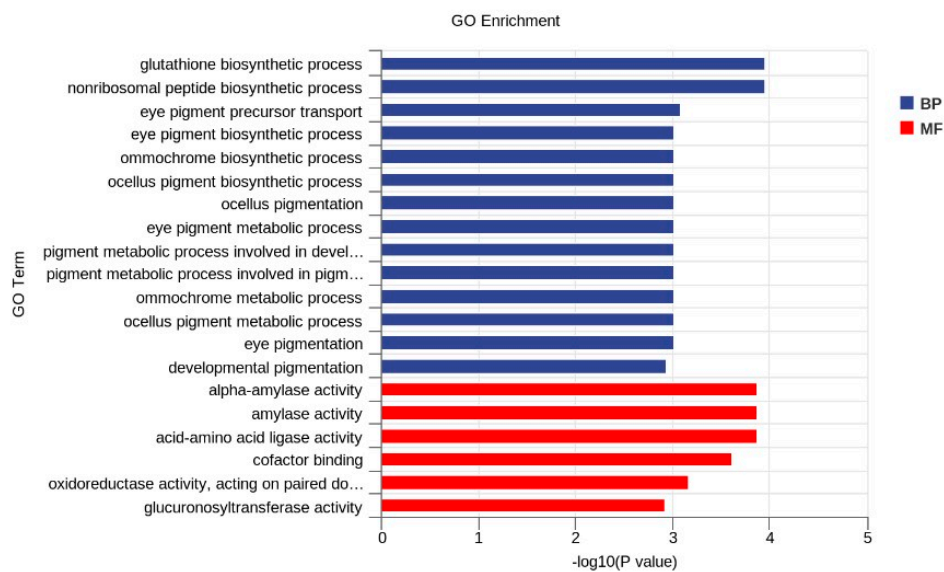

## C-vs-M

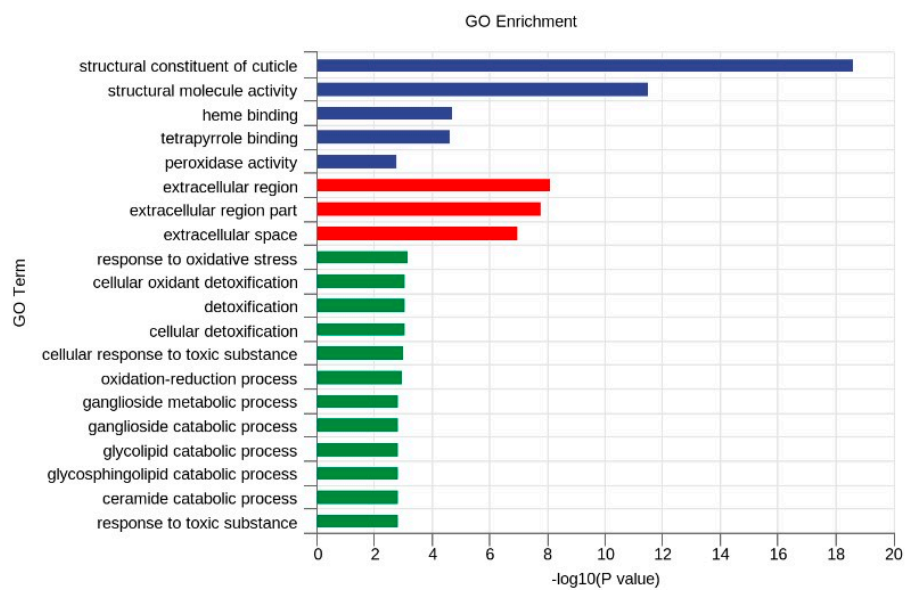

## C-vs-H

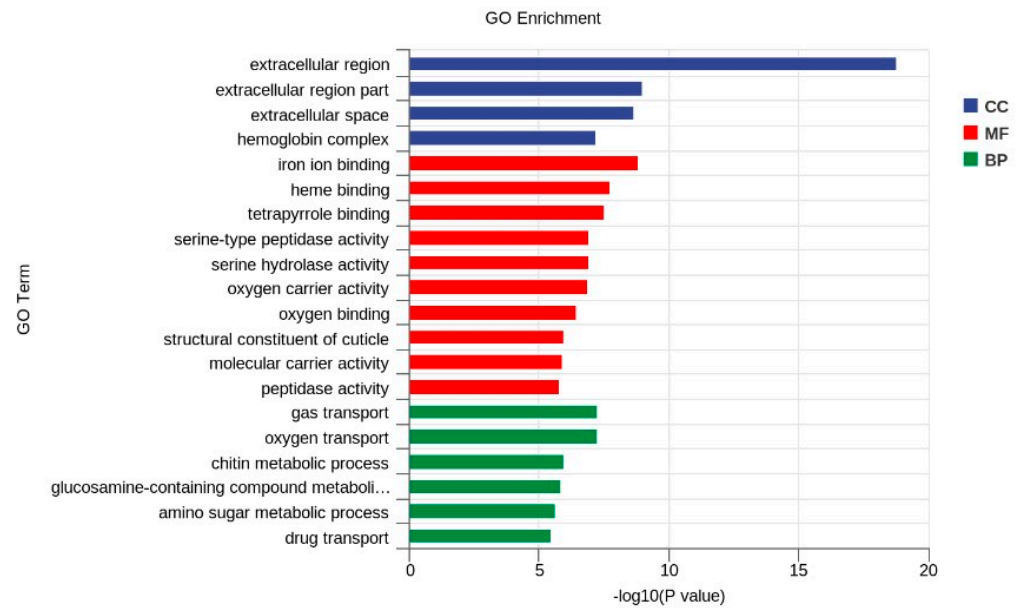

**Figure S3.** GO enrichment analysis of differentially expressed genes (DEGs) in three pravastatin sodium treated groups.

## C-vs-L

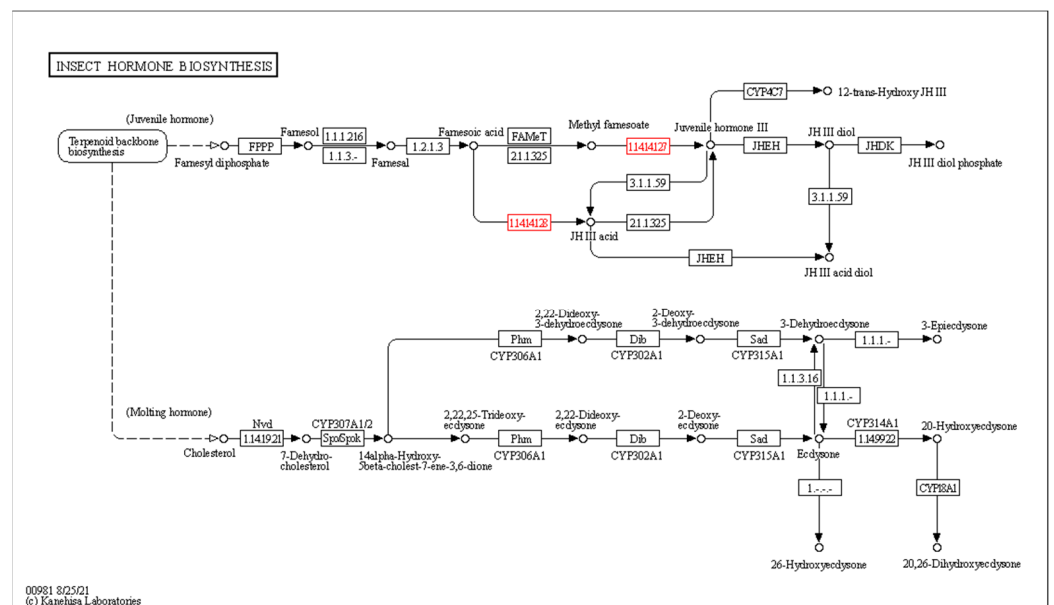

## C-vs-M

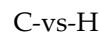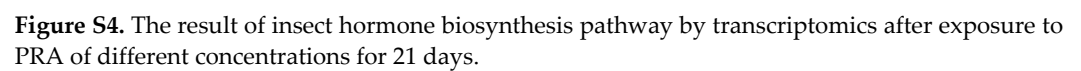

Control group

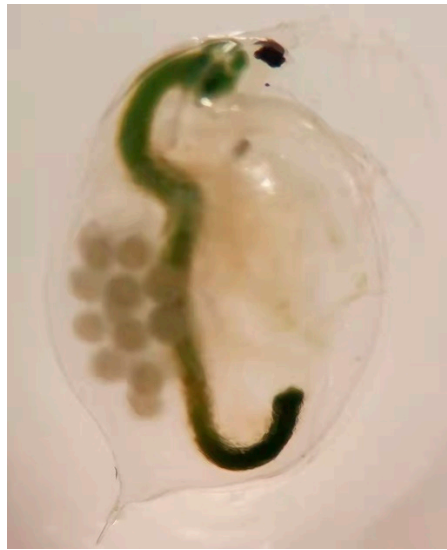

High PRA treatment group

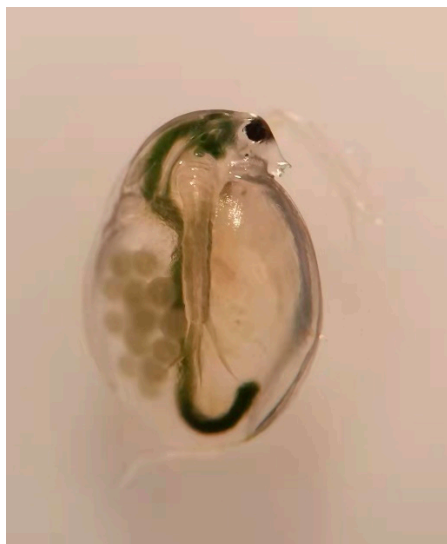

**Figure S5.** Photographs of *D. magna* at 21 days.
